# Supplementary material for: Sexual dimorphism and skull size and shape in the highly specialized snake species, Aipysurus eydouxii (Elapidae: Hydrophiinae)
Source: PeerJ. 2021 Apr 20;9:e11311. doi: 10.7717/peerj.11311 (PMC8063874; doi:10.7717/peerj.11311)
Supplement: Supplemental Information 1 [file peerj-09-11311-s001.xlsx]

## Sheet: Arkusz1
	sex	SVL	Weight	SL	SH	SW	PW1	PW2	PL	NCL	NL	NW	FL	FW1	FW2	PLL	PTL	PTTL	PRART	MXL	MDL	MD2L	DENT	FMDB	ECT	QL	CQL	PFL	PFH	STP
f231613	f	660	282	18.23	5.13	9.53	7.91	6.59	7.02	6.23	5.02	4.27	3.94	4.79	5	5.84	11.11	9.55	2.11	7.08	18.59	15.98	8.47	3.13	5.78	4.07	3.45	2.06	3.95	4.7
f231614	f	660	334	17.95	5.36	9.58	7.89	6.69	7.22	6.43	5.54	4.33	4.21	4.87	5.02	5.65	12.04	10.18	2.65	7.37	19.76	16.67	8.47	3.48	6.94	4.64	3.8	2.06	3.86	4.6
f231015	f	675	248	17.93	5.3		8.34	6.81	7.26	6.2	5.76	4.53	3.89	4.93	5.32	5.28	10.52	7.8	2.09	6.8	18.87	16.09	8.31	3.89	7.01	4.21	3.47	2.35	3.49	4.6
f231617	f	630	278	19.28	5.29	9.37	8	6.62	7.64	6.33	5.46	4.18	3.89	4.88	4.68	5.59	11.17	9.58	2.53	7.37	18.93	15.62	8.01	4.01	6.25	4.33	3.59	2.14	3.84	4.72
f231618	f	690	298	18.41	5.25	9.43	7.67	6.57	7.19	5.72	5.05	3.76	3.66	4.87	5.25	5.11	11.38	8.36	2.13	7.44	18.91	15.65	8.47	3.44	6.29	4.5	3.55	1.69	4.07	4.79
f231619	f	655	270	17.6	4.9	9.48	7.82	6.23	7.05	5.9	5	3.97	3.79	4.5	4.69	5.31	10.9	9.39	2.57	6.55	18.31	14.94	8.24	3.87	6.21	4.1	3.41	1.75	3.81	4.4
f231626	f	825	404	19.3	5.48	9.51	7.99	6.58	8.09	6.82	6.26	4.15	4.36	5.11	5.51	5.73	11.55	9.97	2.45	7.92	19.59	16.45	8.52	4.13	6.82	4.71	3.86	2.26	3.37	5.16
f231627	f	710	298	18.89	5.29	9.41	8.23	6.59	7.68	5.86	5.02	4.12	3.65	4.87	4.83	5.79	11.54	9.96	2.45	7.28	19.9	16.21	8.6	4.64	6.61	5.3	3.76	1.78	3.44	4.91
f231628	f	665	290	18.15	5.13	9.04	8.21	6.01	6.49	6.54	5.83	4.32	3.96	4.66	4.66				2.32	7.05	18.52	15.45	8.04	4	6.37	4.3	3.53	2.25	3.51	4.2
f231630	f	675	314	17.54	5.61	9.59	8.24	6.97	6.89	6.04	4.37	4.03	3.77	4.76	4.58	5.4	11.12	6.68	2.56	6.98	19.41	15.67	8.15	3.37	6.81	4.5	3.63	2.03	3.61	4.54
f231635	f	670	272	17.53	5.68	9.11	7.24	6.51	6.74	5.78	5.53	3.95	3.72	4.7	4.76	5.48	10.78	9.4	2.32	6.98	18.13	15.79	8.37	3.92	6.71	4.33	3.44	1.94	3.48	4.43
f231636	f	690	262	19.44	5.43	9.88	7.9	6.58	7.59	6.15	5.12	4.05	4.15	4.73	4.82	5.77	10.24	7.12	2.4		18.93	15.82	8.32	3.94		4.34	3.62			4.64
f231637	f	620	234	18.01	4.91	9.01	7.39	6.32	6.83	5.23	4.59	3.9	3.94	4.34	4.54	5.48	10.02	7.92	2.17	6.65	17.08	13.83	7.7	3.3	5.97	3.68	3.09	1.58	4.12	4.09
f231709	f	760	367	19.27	5.44	9.57	8.33	6.82	7.46	6.52	5.71	4.1	4.15	4.87	4.98	6.3	9.12	7.25	2.28	6.67	20.28	17.24	7.1	4.2	6.91	4.7	3.67	2.42	3.92	5
f231711	f	640	227	16.94	5.26	8.57	7.06	6.3	7.22	5.61	4.95	3.67	3.53	4.73	4.34	4.89	10.69	8.05	2.2	6.45	17.92	14.97	7.57	3.67	6.06	4.45	3.83	1.65	3.52	4.61
f233192	f	580	192	16.19	4.87	8.05	7.2	6.16	6.73	5.31	4.67	3.45	3.54	4.18	4.41	5.01	9.84	8.26	2.32	5.74	16.84	14.11	7.23	3.97	6.3	3.61	3.22	1.82	3.57	4.35
f245569	f	670		17.32	5.25	8.52	7.31	6.29	7.77	5.61	4.73	4.35	3.98	4.16	4.63	5.39	10.2	9	2.06	6.27	17.58	14.89	8.47	4.1	5.88	3.77	3.22	1.99	3.19	4.43
f245572	f	735		18.2	5.22	9.11	8.45	6.85	7.7	6.46	5.77	4.11	4.37	5.24	5.05	5.49	10.87	9.65	2.19	7.64	16.51	14.05	8.81	4.3	5.83	4.64	3.64	2.47	3.61	5.08
f245575	f	639	213	16.93	5.05	8.28	7.46	6.19	6.7	5.9	4.94	3.64	3.55	4.55	4.68	5.01	9.67	8.02	2.32	6.29	17.32	14.72	7.88	3.27	5.37	3.88	3.07	2.06	3.31	4.51
f245576	f	760		18.69	5.3	9.25	8.12	6.83	7.46	7.03	5.34	4.42	4.06	4.63	4.71	5.71	11.64	8.51	2.63	7.8	19.53	16.42	9.02	3.67	6.83	4.32	3.66	2.1	3.74	5.27
f245577	f	660		17.15	5.04	8.56	7.47	6.19	7.5	5.78	5.34	3.78	3.64	4.66	4.57	4.02	10.15	8.58		5.96			8.22		6.01	3.94	3.17	1.69	3.43	4.31
f245578	f	600	153	16.2	4.85	8.13	7.41	6.22	6.91	5.22	3.77	3.95	3.85	4.17	4.52	4.62	9.07	7.95	2.14	6.12	16.35	13.83	7.58	3.07	5.17	3.55	3.01	2.09	3	4.21
f245579	f			16.65	4.91	8.79	7.56	6.32	7.23	5.56	4.86	3.8	3.86	4.68	4.84	4.82	10.26	8.98		6.68					5.61	3.73	3.29	2.01	2.86	4.21
f245580	f			16.59	5.29	8.43	7.37	6.53	6.76	6.05	5.44	4.2	3.7	4.48	4.76	6.11	10.61	9.48	2.23	6.69	18.19	15.08	8.58	3.52	5.27	4.97	3.26	1.69	3.36	4.39
f245581	f			15.37	4.81	7.62	6.43	6.15	6.24	4.79	4.38	3.37	3.4	4.21	4.26	3.96	9.35	7.73	1.98	5.64	16.27	13.25	7.9	3.76	5.02	3.79	3.13	1.83	2.38	4.01
f245583	f			17.4	5.17	9.43	8.12	6.56	6.95	6.13	5.52	4.35	4.14	4.74	4.92	4.63	11.39	8.66	2.19	6.5	18.65	15.6	8.83	4.35	6.39	4.37	3.71	2.29	3.46	4.6
f245584	f			17.18	4.99	8.28	7.27	6.36	6.62	5.61	5.07	3.96	4.23	4.5	4.52	5.18	11.3	9.7	2.34	6.74	18.02	15.18	8.71	3.48	6.24	4.49	3.33	1.99	3.18	4.99
f245585	f			18.33	5.33	9.26	7.89	6.76	7.04	6.43	5.94	4.15	4.12	5.16	5.13	6.02	11.19	8.16	2.3	7.56	19.53	16.45	8.81	3.84	3.37	4.8	3.37	2.3	3.73	4.87
f245586	f			15.18	4.51	7.31	6.69	6.08	6.45	5.28	4.91	3.54	3.55	4.21	4.48	4.17	9.16	8.34	2.02	5.38	15.61	12.54	7.23	3.27	5.22	3.15	3.02	1.4	2.98	3.9
f245587	f			17.06	5.02	8.25	7.39	6.26	7.49	5.55	7.95	4	3.66	4.26	4.37	5.45	10.21	8.75	2.29	7.32	17.35	13.84	7.55	3.39	7.75	3.57	3.19	1.68	3.28	3.93
f245590	f			16.51	4.63	8.68	7.08	6.39	6.99	5.94	5.25	3.74	3.68	4.17	4.83	4.78	10.12	8.1	2.26	5.86	16.99	14.17	7.13	3.63	5.83	3.79	3.25	1.85	3.33	4.05
f245591	f			16.19	4.88	8.52	7.57	6.52	7.34	5.54	4.87	4.19	3.34	4.54	4.59	4.73	10.09	8.43	2.29	6.11	17.49	16.06	7.76	3.62	5.36	3.91	3.66	1.9	3.47	4.66
f245593	f			17.81	5.26	9.56	7.78	6.66	7.49	5.8	5.34	4.08	3.91	4.77	5.02		10.61	8.96	2.39	7.02	19.19	15.82	8.87	4	6.15	4.5	3.29	1.88	3.21	4.76
f245596	f			17.73	4.96	8.98	8.02	6.86	7.29	5.87	5.02	4.19	3.62	4.54	4.34	4.97	10.75	9.03	2.38	7.51	18.87	15.34	8.3	3.44	6.05	4.34	3.69	1.92	3.29	5.01
f245597	f			18.37	5.59	9.66	7.95	6.71	7.6	6.22	5.65	3.98	3.98	7.97	5.66	5.58	11.56	8.28	2.73	6.96	19.57	16.39	9.21	3.86	6.69	4.4	3.73	2.18	3.7	4.42
f245598	f			19.06	5.37	9.79	8.49	6.68	7.62	6.77	5.94	4.39	4.39	5.08	5.33	5.6	12.48	11.08	2.6	7.96	20.37	17.31	9.48	3.61	6.36	4.86	3.79	2.45	3.88	4.87
f245600	f			16.77	4.93	8.35	7.33	6.41	6.64	5.72	4.8	3.77	4.17	4.43	4.86	5.36	10.65	8.47	2.38	5.15	17.71	14.53	7.9	3.63	5.94	4.19	3.41	2.1	2.99	4.46
f245601	f			16.82	5.01	8.63	7.81	6.54	7.32	6.17	5.62	4.01	3.99	4.69	4.62	5.26	10.38	9.66	2.23	7.03	18.49	15.21	8.26	3.43	6.67	3.98	3.37	2.06	3.74	4.99
f245603	f			18.33	5.5	9.05	8	4.79	7	6.21	5.25	4.2	4.36	5	5.27		10.56	9.3	2.41	7.48	19.63	16.46	8.79	3.6	7.17	4.24	3.53	2.01	3.66	4.84
f245605	f			17.97	5.28	9.22	8	6.68	7.51	5.84	4.45	3.87	4.28	4.92	5.12	5.02	10.74	9.3	2.62	7.16	18.65	15.39	6.66	4	6.41	4.13	3.43	1.81	3.51	4.41
f245606	f			18.04	5.18	9.31	8.23	6.52	7.13	6.08	5.38	4.33	3.94	5.26	4.99	5.26	10.94	9.25	2.45	7	19.17	15.92	9.12	4.06	5.95	4.42	3.95	2.4	3.53	4.67
f245607	f			18.16	4.98	9.02	8.07	6.66	7.55	6.12	5.66	3.75	4.66	4.85	4.99	5.36	11.3	9.4	1.84	6.67	19.17	16.3	7.31	3.64		4.33	3.46	1.71	3.39	4.94
f245608	f			17.43	5.15	8.94	8.19	6.51	7.2	5.92	5.23	3.87	4.01	4.66	5	5.46	10.54	8.57	2.24	6.97	17.71	14.72	8.44	3.41	5.38	3.9	3.61	1.96	2.78	4.48
f245609	f			17.33	4.79	8.07	6.87	6.17	7.38	5.68	5.17	3.83	3.96	4.442	4.47	5.1	10.17	9.49	2.08	6.64	17.59	14.68	8.25	3.26	5.07	3.9	3.43	1.99	3.24	4.92
f245612	f			18.15	5.2	8.7	7.89	6.73	7.41	6.31	4.95	3.84	3.8	4.49	5.14		10.93	8.99	2.52	7.09	17.68	14.43	8.14	3.64		4.27	3.54	2.28	3.41	4.55
f245614	f			18.44	5.15	9.14	7.87	6.4	7.57	5.76	5.3	4.14	4.24	4.88	5.08	5.34	10.41	9.07	2.06	6.93	17.79	14.59	8.4	3.36	5.81	3.99	3.72	2.03	3.35	4.69
f245615	f			17.5	5.26	8.92	7.37	6.81	7.4	5.99	4.32	4.17	3.91	4.84	5.02	5.38	11.05	6.77	2.25	6.81	18.36	15.17	8.3	3.4	6.17	4.2	3.45	2.26	3.42	4.8
f245616	f			15.92	4.88	7.35	6.74	6.19	6.5	4.95	4.48	3.56	3.16	3.86	4.13	4.95	9.57	7.47	1.97	5.62	15.55	13.03	7	2.36	4.94	3.75	3.39	1.78	3.2	4.74
f245617	f			17.97	5.23	9.67	7.91	6.66	6.8	6.57	5.49	4.12	4.31	4.89	4.89	5.33	11.31	10.03	2.27	6.75	19.12	15.91	8.35	3.86	6.25	4.2	3.6	2.33	3.65	4.59
f245631	f			17.12	4.99	8.22	7.33	5.84	7.37	5.85	5.21	3.52	4.03	4.36	4.69	5.68	8.23	7.22	2.38	6.38	19.94	16.57	9.44	3.78	6.42	3.87	3.48	2.19	3.03	4.24
f245618	f			17.77	4.99	9.01	7.86	6.77	7.6	5.73	5.16	4	4.06	4.84	5.18	5.89	9.74	8.28	2.34	7.27	18.77	15.6	9	3.58		3.77	3.55	1.89	3.28	5
f245619	f			17.17	4.91	8.21	7.37	6.5	6.96	5.26	4.79	3.75	3.52	4.54	5.24	4.99	10.49	9.26	2.3	6.33	17.61	14.49	7.91	3.33	6.06	3.82	3.33	1.62	2.91	4.7
f245620	f			17.67	5.21	8.98	7.62	6.43	7.33	6.06	4.7	2.72	4.1	5.19	5.39	5.07	10.23	8.49	2.15	5.18	17.83	14.95	8.03	3.46	6.11	3.97	3.35	2.21	2.93	4.42
f245621	f			17.14	5.55	8.82	7.15	6.44	7.39	5.94	5.1	3.72	3.93	4.7	4.72	5.19	10.97	8.94	2.16	6.85	17.78	14.6	9.25	3.49	6.36	4.44	3.37	1.9	3.44	4.82
f245622	f			18.43	5.4	9.17	8.58	6.74	7.27	5.97	4.82	4.3	4.64	5.22	5.52	5	10.11	9.3	2.28		18.59	15.43	8.72	2.81	6.07	4.54	3.57	1.9	3.59	4.8
f245623	f			16.64	4.82	7.97	7.75	6.35	7.09	5.53	4.94	4.17	3.72	4.83	4.85	4.6	9.56	8.21	2.41	6.79	16.68	13.42	8.18	3.83	5.96	3.98	3.22	1.91	3.2	4.79
f245624	f			17.94	5.12	9.01	7.94	6.47	7.49	6.09	3.01	4.42	3.94	5.09	5.07	5.61	10.86	9.37	2.22	7.4	18.82	15.79	8.57	3.26	6.24	4.13	3.72	2.09	3.24	4.97
f245625	f			18.8	5.25	9.89	7.96	6.91	7.36	6.45	5.6	4.77	4.33	5.39	4.99	6.09	11.56	9.98	2.28	7.64	19.53	16.42	8.86	4.01	6.41	4.78	3.63	2.31	3.82	5.18
f245626	f			19.06	5.31	9.18	7.63	6.38	7.63	6.05	5.38	4.06	3.95	4.95	5.07	5.551	11.33	9.01	2.58	7.17	19.87	16.68	8.74	4.23	6.84	4.37	3.88	2.02	3.73	4.94
f245627	f			17.26	5.03	9.14	7.72	6.55	7.66	5.66	4.6	3.93	3.82	4.66	4.59	4.88	10.4	9.47	1.82	6.84	17.41	14.41	8.16	3.57	5.66	4.27	3.75	1.79	3.91	4.83
f245628	f			15.81	4.9	8.49	7.59	6.51	6.95	5.38	4.88	3.88	3.81	4.18	4.71	4.73	9.73	8.49	2.22	6.97	16.26	13.25	7.45	3.15	5.74	3.76	3.03	1.61	2.92	4.33
f245629	f			18.72	5.67	10.19	8.26	7.07	7.79	7.12	6.23	4.67	4.49	5.6	5.93	6.08	10.95	8.79	2.4	7.82	19.89	16.58	9.19	3.8	7.07	4.35	3.63	2.39	3.19	5.14
f245630	f			16.97	5.14	8.58	7.22	6.39	6.8	5.77	4.08	3.25	3.88	4.47	4.8	5.11	9.71	8.59	2.26	7.15	17.57	14.4	8.18	3.66	6.67	4.28	3.69	1.94	3.23	4.84
f245632	f			16.65	4.8	8.01	7.21	6.42	6.85	5.74	4.41	3.85	3.59	4.54	4.71	5.2	9.75	8.2	2.29	5.85	17.8	14.79	8.62	2.78	6.02	3.84	3.19	1.97	3.13	4.55
f245633	f			17.47	5.37	8.47	7.73	6.68	6.77	5.71	5.13	3.72	3.97	5.03	4.73	5.42	9.99	7.01	2.06	6.41	16.09	13.37	8.24	2.74	6.45	4.38	3.4	2.02	3.27	4.68
f245634	f			17.86	5.51	9.71	8.27	6.85	7.27	5.97	5.13	3.66	3.75	4.64	5.15	5.49	10.08	7.95	2.17	7.01	17.69	14.5	8.21	3.17	5.4	4.2	2.67	2.05	3.28	4.68
f245635	f			18.13	4.92	9.17	8	6.32	7.47	6.17	5.27	4.12	4.52	5.37	5.19	4.4	10.78	8.37	1.73	7.63	14.44	14.45	8.03	3.39		3.81	3.59	2.2	3.33	4.7
f245637	f			17.26	5.02	9.27	7	6.39	6.52	6.13	5.05	3.72	3.8	4.48	4.92	4.83	10.12	7.53	2.04	6.84	17.41	14.25	8.01	3.61	5.95	3.99	2.91	1.91	3.5	4.32
f245638	f			18.58	5.31	9.59	7.72	6.69	8.13	6.69	5.76	4.36	4.11	4.54	4.39	5.64	11.5	9.95	2.72	7.79	18.02	14.62	7.99	3.53	6.32	4.76	3.71	2.25	3	4.68
m231616	m	560	190	16.31	5.13	8.75	7.74	6.68	7.1	5.33	4.68	4.11	3.8	4.81	4.8	4.94	9.13	8.57	2.31	5.79	17.11	14.09	7.43	4.01	5.79	4.21	3	1.7	3.69	3.8
m231620	m	625	214	18.31	5.16	9.45	8.51	6.85	7.39	5.94	5.19	4.06	4.01	5.24	5.19	5.26	10.36	9.14	2.1	6.73	18.26	15.19	8.06	4.14	6.41	4.74	3.06	1.78	3.92	4.18
m231621	m	640	306	19.04	5.24	9.72	8.64	7	7.89	6.3	5.75	4.57	4.04	5.07	4.99	5.56	10.84	9.68	2.46	7.38	19.51	15.97	8.49	4.47	6.7	4.49	3.39	2.41	3.97	4.68
m231622	m	550	190	16.45	5.2	8.43	7.23	6.75	7	5.2	4.5	4.11	3.78	4.7	4.7	4.77	9.68	8.32	2.17	6.07	16.84	13.96	7.39	3.94	5.71	3.97	2.92	2.01	3.64	4.2
m231623	m	590	264	18.16	5.36	9.7	7.48	6.77	7.28	5.95	5.58	4.48	3.8	4.59	4.69	5.16	10.79	9.89	2.09	6.65	17.71	14.92	7.87	3.65	6.36	4.4	3.49	2.41	3.65	5.12
m231624	m	580	216	17.83	5.18	9.16	7.46	6.48	7.25	5.87	5.23	4.48	3.58	4.8	5.11	5.37	10.15	8.95	2.3	5.64	18.44	15.1	8.25	4.61	6.33	4.67	3.34	2.02	3.81	4.9
m231625	m	625	300	18.01	5.32	9.62	7.8	6.68	7.69	6.17	5.51	5.08	3.98	5.58	5.55	5.12	11.18	9.6	2.35	6.37	19.07	15.3	7.95	4.05	6.35	4.51	3.65	2.08	3.69	5.31
m231631	m	600	212	16.86	5.04	9.96	8.78	6.69	6.91	5.68	4.89	4.69	3.85	5.45	5.14	5.33	10.05	8.28	2.31	6.44	17.58	14.44	7.45	3.56	6.07	3.93	2.81	2.33	3.93	4.18
m231632	m	520	130	17.2	4.82	8.66	7.37	6.27	6.88	5.67	4.88	3.78	3.35	4.31	4.22	4.73	9.78	8.31	2.21	5.47	16.79	13.8	7.27	3.95	5.66	3.67	2.79	1.76	2.98	3.95
m321633	m	580	204	17.75	5.34	9.55	8.29	6.71	7.28	6.25	5.13	4.36	4	4.84	4.66	5.36	10.08	8.67	2.04		17.73	14.93	7.79	3.96	5.92	4.02	3.16	1.94	3.44	4.36
m231634	m	600	206	17.49	5.5	8.72	7.5	6.62	7.03	5.74	5.24	3.81	3.64	4.46	4.4	4.8	10.58	8.97	2.28	6.77	18.08	14.94	7.97	3.84	6.12	4.47	3.22	1.81	3.27	4.48
m232775	m	470	88	14.85	4.72	6.7	6.26	5.63	6.21	4.97	4.3	3.77	3.08	4.03	3.85	4	8.28	7.27	1.77	5.01	14.76	12.71	6.33	3.84	4.68	3.12	2.68	1.71	2.63	3.6
m232776	m	575	141	16.16	4.75	8.17	7.47	6.13	6.86	5.56	4.23	3.94	3.54	4.61	4.76	4.69	9.63	8.15	2.11	5.65	16.85	14.1	7.57	3.6	5.62	3.44	3.03	2	3.43	4.35
m233179	m	468	191	14.98	4.31	7.04	6.38	5.78	5.85	4.96	4.27	3.58	3.19	3.91	3.71	4.3	8.86	7.48	1.97	5.23	15.2	12.7	6.72	3.62	4.77	3.07	2.66	1.66	3.07	3.67
m233179	m	592	193	16.55	4.83	8.35	7.47	6	6.42	5.31	4.26	3.99	3.75	4.27	4.62	5.3	8.96	7.38	2.1	6.43	17.13	14.4	7.47	3.84	6.14	3.69	3.27	1.67	3.57	4.55
m233180	m	580	155	18.44	5	8.05	7.36	6.35	6.95	5.95	5.25	3.56	3.84	4.64	4.4		10.26	6.46	2.16	6.68	17.88	15.12	7.79	4.15	6.26	4.02	2.86	2.29	3.05	4.2
m233182	m	600	181	17.91	5.27	8.73	7.9	6.46	7.26	5.22	4.35	3.91	3.66	4.68	4.86		9.93	7	2.24	6.61	17.35	14.63	7.96	3.77	6.57	4.27	2.88	2.06	3.48	4.23
m233184	m	450	89	15.16	4.59	7.08	6.81	6.17	6.11	4.28	3.84	3.47	3.19	3.81	4.09	4.06	9.06	7.7	1.82	5.62	15.39	12.47	6.29	3.92	4.86	3.31	2.63	1.43	2.88	3.71
m233187	m	475	91	14.44	4.21	7.04	6.29	5.71	6.32	4.29	3.93	3.28	3.2	3.64	3.47	3.98	8.7	6.46	2.26	5.18	15.2	12.18	6.76	4.13	4.22	3.04	2.94	1.62	3.1	3.82
m233188	m	530	162	15.43	4.86	7.63	6.65	6.1	6.91	5.13	4.51	3.35	3.58	3.8	3.94		9.29	8.18	2.09	6.04	16.83	13.97	7.63	4.12	5.78	3.73	2.84	1.78	2.97	3.97
m233189	m	558	143	16.49	4.98	8.32	7.61	6.37	6.95	5.89	5.14	3.99	3.67	4.68	4.86	4.95	9.55	7.17	2.1	5.43	17.1	14.15	7.48	3.84	5.2	3.95	2.83	1.75	3.75	4.34
m233190	m	593	174	17.65	5.11	8.98	7.77	6.52	7.07	5.58	4.79	4.49	3.72	4.78	5	5.16	10.43	8.42	2.27	6.48	17.73	14.59	7.97	3.8	5.97	4.14	3.12	1.99	3.55	4.23
m233191	m	595	193	17.52	5.4	8.73	7.67	6.55	7.06	5.73	4.84	4.05	3.98	7.66	6.51	5.06	10.21	9.09	2.49	6.77	17.95	14.68	7.99	4.22	6.62	4.22	2.79	2.19	4	4.73
m233193	m	500	40	15.28	4.68	7.49	6.45	6.19	6.72	5.01	4.55	3.4	3.41	3.82	3.88	4.56	8.79	8.16	2.02	5.4	15.66	13.05	6.47	4.33	4.17	3.11	2.94	1.77	3.13	3.73
m233194	m	591	190	18.14	5.42	8.31	7.57	6.39	7.5	5.9	5.2	3.99	3.85	4.62	4.59	5.14	10.34	8.56	2.2	4.69	17.95	14.61	8.17	3.85	5.78	4.18	3.06	1.95	3.47	4.7
m233196	m	630	266	17.97	5.08	8.17	6.82	6.15	6.98	5.45	4.99	3.6	3.86	4.23	4.16	5	8.59	5.02	2.17	6.43	18.22	15.11	8.02	4.03	5.57			1.88	3.95	4.65
m251467	m			17.65	5.4	8.99	8.06	6.41	7.21	6.65	5.44	4.22	4.03	5.18	5.38	4.35	9.92	8.51	2.63	7.2	19.79	16.13	7.68	4.96	4.07	4.05	3.09	2.36	3.19	4.59
m251469	m			17.77	5.05		7.72	6.83	7.55	5.84	5.01	4.58	4.24	4.94	5.04	4.73	11.07	8.93	2.01	6.89	17.61	14.71	8.29	3.63	6.08	4.1	3.15	2.12	2.92	4.2
m251471	m			16.9	4.81		7.39	6.57	7.35	5.13	4.31	4	3.51	4.84	4.6	4.53	8.92	7.91	2.18	6.14	18	14.51	7.93	3.79	5.21	3.89	3.53	2.19	3.28	4.62
m251473	m			17.43	4.91	8.77	7.75	6.34	6.89	5.57	4.78	3.91	3.82	4.91	5.23	5.27	9.47	7.77	2.28	6.57	17.35	14.08	8.77	3.37	5.14	3.68	3.02	1.81	3.41	4.47
m251474	m			16.34	5	7.9	7.2	6.08	6.87	5.26	4.59	3.7	3.93	4.34	4.52	4.71	9.75	7.27	2.12	6.54	16.78	13.53	7.63	3.51	5.25	3.87	3.19	1.83	3.01	4.48
m251475	m			17.69	5.08	9.06	8.14	6.82	8.08	5.81	5.27	4.2	3.63	5.29	5.67	5.04	10.69	8.75	2.08	7.29	18.06	14.88	8.2	5.35	5.77			2.17	3.23	4.77
m251476	m			17.47	5.18	8.6	8	6.77	6.97	6.73	5.78	4.65	4.02	5.34	5.23	5.43	10.39	8.78	2.32	6.79	18.03	14.58	8.51	3.17	6.81	4.21	3.26	1.82	3.18	4.76
m251477	m			18.44	5.52	8.75	8.17	7.15	8.01	6.79	6.12	4.22	3.69	5.23	4.92	5.48	10.79	8.98	2.11	6.98	18.67	15.51	8.34	3.39	6.16	4.69	3.51	2.3	2.8	4.82
m251478	m			15.38	4.55	7.47	7.19	6.14	6.69	5.03	3.99	3.56	3.43	4.28	4.2	4.21	8.9	6.77	2.11	5.59	15.57	13.04	7.13	2.95	3.83			1.63	2.58	2.72
m251479	m			18.47	5.55	9.48	8.24	6.89	7.02	6.82	6.11	4.31	4.41	5.07	5.35	5.63	9.32	7.19	2.38	7.16	18.39	15.17	8.81	4.12	5.64	4.03	3.38	2.17	3.14	4.24
m251480	m			17.02	5.05	8.7	7.93	6.74	6.93	6.13	5.42	4.13	3.9	4.57	5.48	5.19	10.05	8.46	2.34	6.86	17.46	14.41	8.32	3.56	5.54	4.04	3.37	2.17	3.07	4.7
m251482	m			15.39	4.7	7.74	7.25	6.62	7.01	5.42	4.41	4.02	3.54	4.29	4.22	4.42	9.14	7.72	2.04	6.33	15.85	13.07	7.64	2.84	5.55	3.33	3.09	1.88	2.84	4.18
m251484	m			15.71	4.75	8.18	7.16	6.3	6.96	5.35	4.65	3.58	3.5	4.31	4.32	4.62		7.38	1.91	6.05	17.91	14.99	8.8	3.39	5.51	3.57	3.03	1.17	3.28	4.17
m251450	m			18	5.32	9.49	8.35	6.92	7.68	6.24	5.51	4.6	4.24	5.31	5.02	5.73	10.73	9.46	2.47	7.36	18.61	15.51	8.79	3.91	6.17	4.01	3.59	2.01	4.08	4.68
m251453	m			16.48	4.86	8.04	7.29	6.39	7	6.22	4.88	4.16	4.09	4.7	4.44	4.95	9.24	8.11	2.17	6.35	17.41	14.22	7.75	4.01	6.06	3.98	2.99	1.79	3.09	4.16
m251456	m			16.62	5.04	8.06	7.45	6.58	6.11	5.42	4.7	4.26	3.85	4.45	4.59	4.13	9.93	8.05	2.07	6.52	17.03	13.91	7.78	3.24	4.23	3.66	3.03	1.71	3.16	4.19
m251459	m			18.09	5.12	9.16	7.33	6.85	7.53	6.13	5.08	4.3	4.31	5.21	5.27	5.38	9.73	8.37	2.4	7.5	19.07	15.65	8.15	4.17	7.2	4.17	3.28	2.02	3.03	4.59
m251460	m			18.91	5.02	8.81	7.74	6.56	7.53	6.36	5.38	4.26	3.77	5.24	4.83	5.96	11.56	9.24	2.2	6.23	19.05	15.82	8.92	3.25	6.31	4.46	3.5	2.02	3.25	4.51
m251464	m			16.33	5.05	8.81	7.92	6.6	7.05	5.41	4.31	3.81	3.6	4.79	5.07	4.68	9.98	8.02	2.27	6.47	17.15	13.32	7.94	3.69	5.8	4	3.11	2.01	2.55	3.82
m251466	m			17.22	4.91	7.95	7.26	6.68	7.06	5.15	4.61	3.68	3.55	4.46	3.7	5.24	10.1	7.84	2.22	6.15	18.3	14.74	7.98	3.4	6.03	3.73	3.15	2.21	3.2	4.74
